# Supplementary material for: Comparison of a human neuronal model proteome upon Japanese encephalitis or West Nile Virus infection and potential role of mosquito saliva in neuropathogenesis
Source: PLoS One. 2020 May 6;15(5):e0232585. doi: 10.1371/journal.pone.0232585 (PMC7202638; doi:10.1371/journal.pone.0232585)
Supplement: S6 Table — Proteins are sorted according to the fold change in JEV- (or secondly in WNV-) infected cells compared to untreated cells. (XLSX) [file pone.0232585.s010.xlsx]

## Sheet: Sheet1
	Protein #	Gene ID #	Gene symbol	Name	JEV infected FC (adj. pValue)	WNV infected FC (adj. pValue)
Down-regulated proteins during JEV infection	Q99797	4285	MIPEP	mitochondrial intermediate peptidase	4.61 (3,06E-02)
	Q9Y6W5-2	10163	WASF2	WAS protein family member 2	3.67 (4,08E-05)
	E7ESU0	10869	USP19	ubiquitin specific peptidase 19	3.24 (4,61E-02)
	Q9BZX2	7371	UCK2	uridine-cytidine kinase 2	2.58 (1,85E-03)
	O95400	10421	CD2BP2	CD2 cytoplasmic tail binding protein 2	1.82 (1,53E-02)
	P00338	3939	LDHA	lactate dehydrogenase A	1.77 (2,33E-02)
	Q9Y316	51072	MEMO1	mediator of cell motility 1	1.75 (2,34E-03)
	Q9H3M7	10628	TXNIP	thioredoxin interacting protein	1.74 (3,06E-02)
	Q9NRG7-2	56948	SDR39U1	short chain dehydrogenase/reductase family 39U member 1	1.69 (2,48E-02)
	Q9NPQ8-4	60626	RIC8A	RIC8 guanine nucleotide exchange factor A	1.66 (3,29E-02)
	Q3MHD2	124801	LSM12	LSM12 homolog	1.65 (2,32E-02)
	P55145	7873	MANF	mesencephalic astrocyte derived neurotrophic factor	1.64 (4,16E-02)
	P13861	5576	PRKAR2A	protein kinase cAMP-dependent type II regulatory subunit alpha	1.60 (4,61E-02)
	P13639	1938	EEF2	eukaryotic translation elongation factor 2	1.56 (7,22E-03)
	P21980	7052	TGM2	transglutaminase 2	1.56 (1,63E-03)
	Q96EK6	64841	GNPNAT1	glucosamine-phosphate N-acetyltransferase 1	1.54 (1,30E-02)
	Q15813	6905	TBCE	tubulin folding cofactor E	1.52 (4,50E-02)
	O95487-2	10427	SEC24B	SEC24 homolog B COPII coat complex component	1.51 (2,97E-02)
Down-regulated proteins during JEV and WNV infection	R4GN98	6277	S100A6	S100 calcium binding protein A6	2.73 (1,22E-02)	2.78 (1,49E-02)
	F8VZJ2	4666	NACA	nascent polypeptide-associated complex alpha subunit	1.80 (1,94E-02)	2.15 (1,88E-03)
	Q15056-2	7458	EIF4H	eukaryotic translation initiation factor 4H	1.78 (1,80E-02)	2.05 (1,60E-03)
	E9PGT6	10920	COPS8	COP9 signalosome subunit 8	1.67 (9,82E-03)	2.22 (1,93E-04)
	P09382	3956	LGALS1	galectin 1	1.66 (7,22E-03)	1.98 (2,36E-04)
Down-regulated proteins during WNV infection	Q9P0S9	51522	TMEM14C	transmembrane protein 14C		4.12 (1,10E-02)
	Q9NRX1	56902	PNO1	partner of NOB1 homolog		3.03 (1,23E-02)
	P61758	7411	VBP1	VHL binding protein 1		2.69 (1,93E-06)
	P49366	1725	DHPS	deoxyhypusine synthase		2.56 (1,36E-02)
	Q99497	11315	PARK7	Parkinsonism associated deglycase		2.49 (1,32E-07)
	Q04837	6742	SSBP1	single stranded DNA binding protein 1		2.14 (8,85E-05)
	O00499-9	274	BIN1	bridging integrator 1		2.06 (2,90E-02)
	O00743	5537	PPP6C	protein phosphatase 6 catalytic subunit		1.85 (2,85E-03)
	Q9Y3B8	25996	REXO2	RNA exonuclease 2		1.73 (1,36E-02)
	P46777	6125	RPL5	ribosomal protein L5		1.60 (2,73E-02)
	P12081	3035	HARS	histidyl-tRNA synthetase		1.52 (1,99E-02)
	P53384-2	4682	NUBP1	nucleotide binding protein 1		1.51 (2,91E-02)
	P12955	5184	PEPD	peptidase D		1.50 (9,17E-03)
